# Supplementary material for: High Mobility Group Box 1 and TLR4 Signaling Pathway in Gnotobiotic Piglets Colonized/Infected with L. amylovorus, L. mucosae, E. coli Nissle 1917 and S. Typhimurium
Source: PubMed Central journal article supplement (PMC6940798; doi:10.3390/ijms20246294), 2019-12-13

# SCHEMA OF EXPERIMENT WITH GNOTOBIOTIC PIGLETS

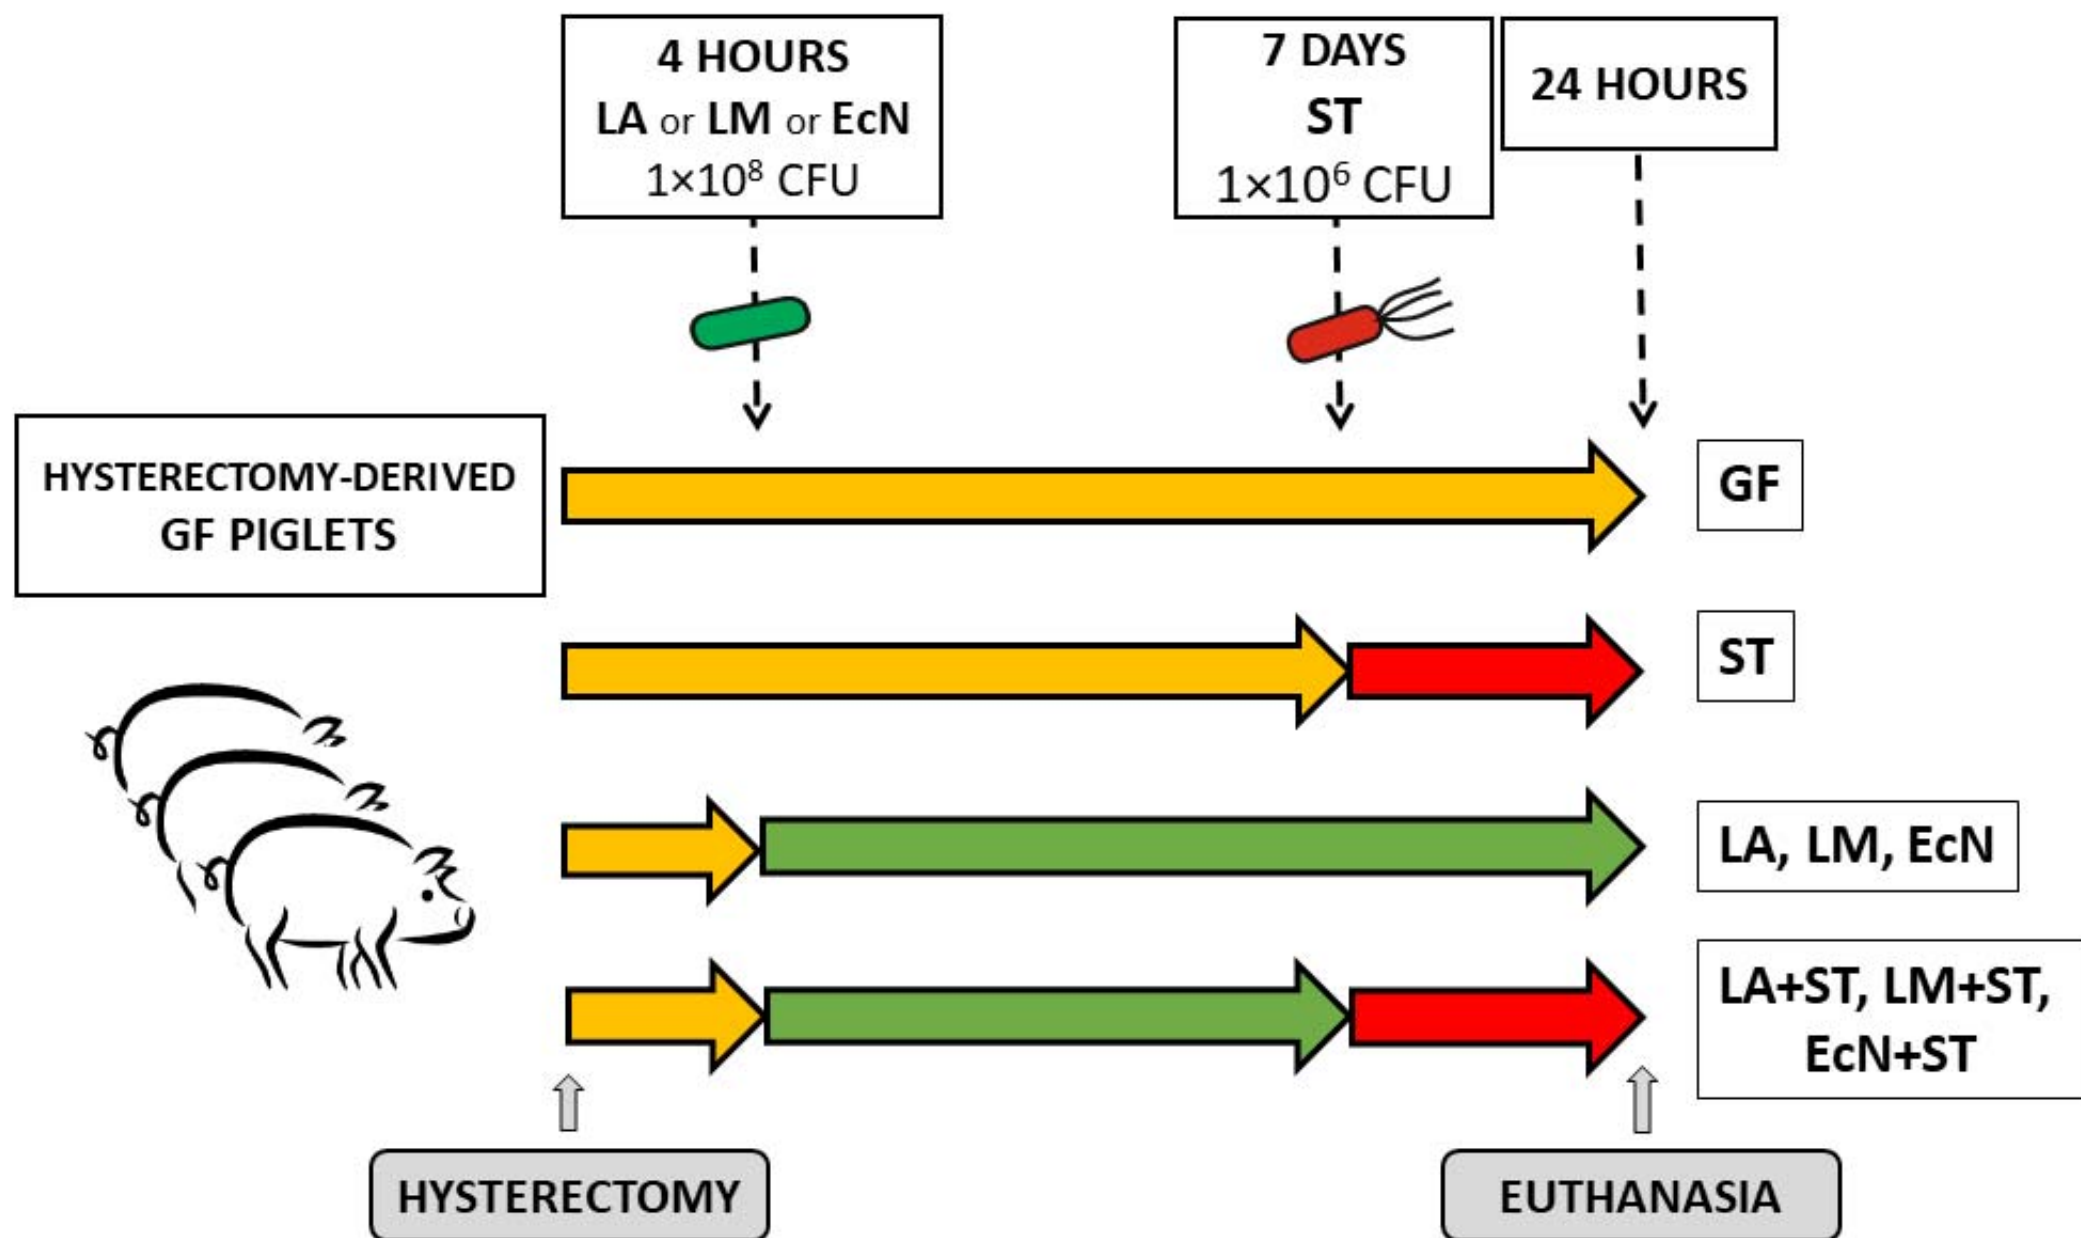

Supplement: ijms-20-06294-s001.pdf [file ijms-20-06294-s001.pdf]
